# Supplementary material for: Exciton dynamics and annihilation in WS2 2D semiconductors
Source: Royal Society of Chemistry journal article supplement (doi:10.1039/c5nr00383k), 2015-01-01
Supplement: c5nr00383k1.pdf [file c5nr00383k1.pdf]

## Supporting Information

Exciton Dynamics and Annihilation in WS<sub>2</sub> 2D Semiconductors

Long Yuan and Libai Huang\*

Department of Chemistry, Purdue University, West Lafayette, Indiana 47907, United States

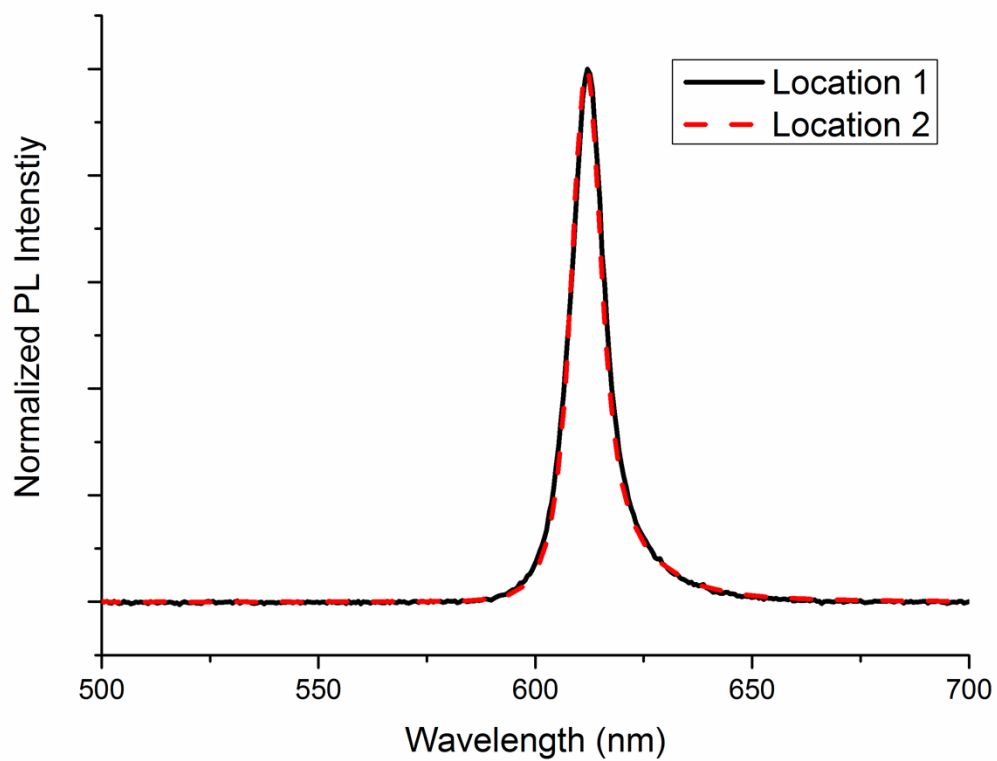

**Fig.S1.** *PL spectrum at different location for monolayer WS<sub>2</sub>.*

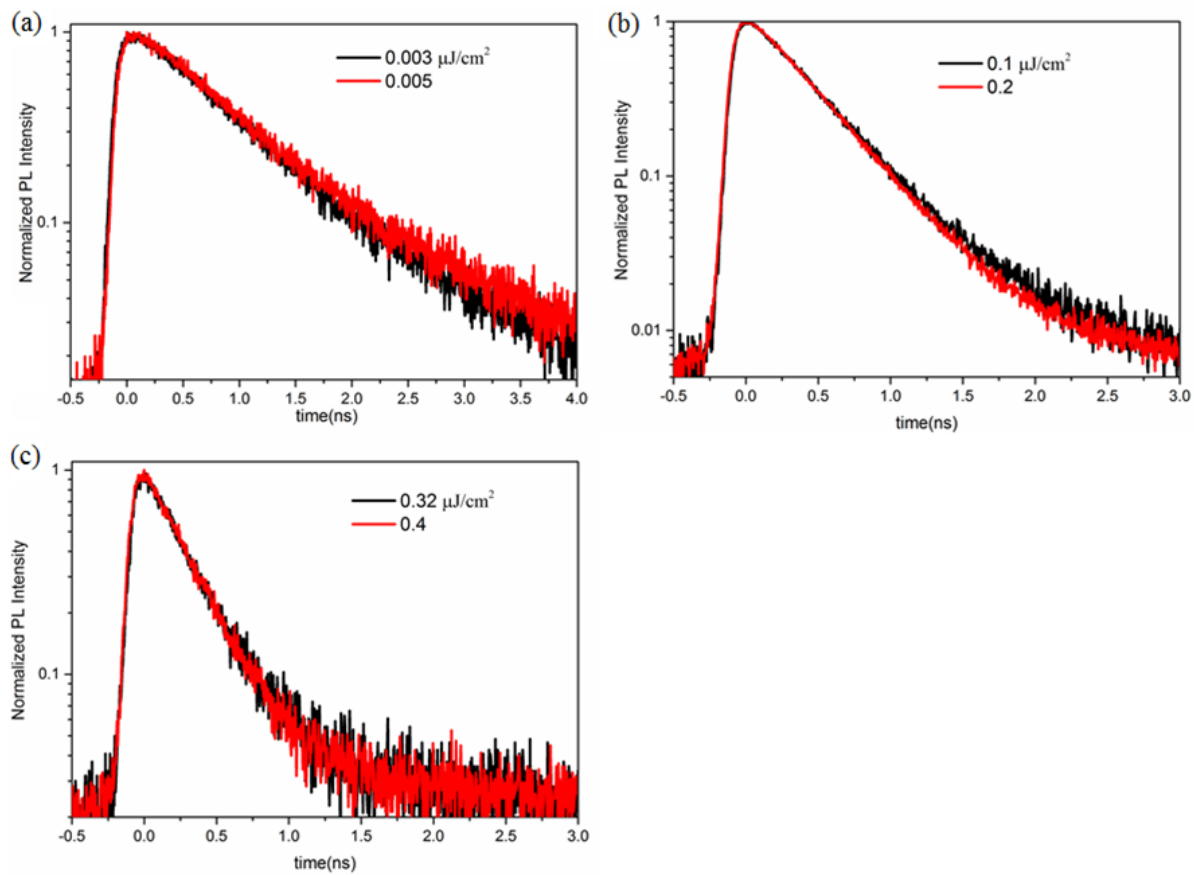

**Fig. S2.** PL decay at two different low excitation densities to obtain the exciton lifetime without annihilation for WS<sub>2</sub> (a) monolayer, (b) bilayer, and (c) trilayer.

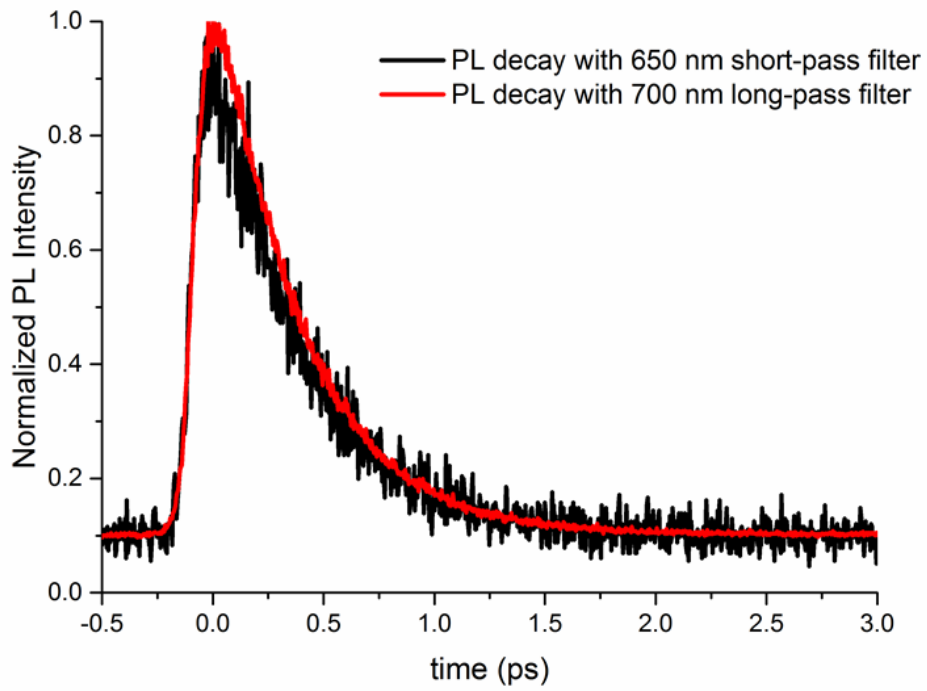

**Fig. S3.** PL decay with 650 nm short-pass filter (black line) and 700 nm long-pass filter (red line) in  $WS_2$  bilayer at pump intensity of  $0.2 \mu J/cm^2$ .

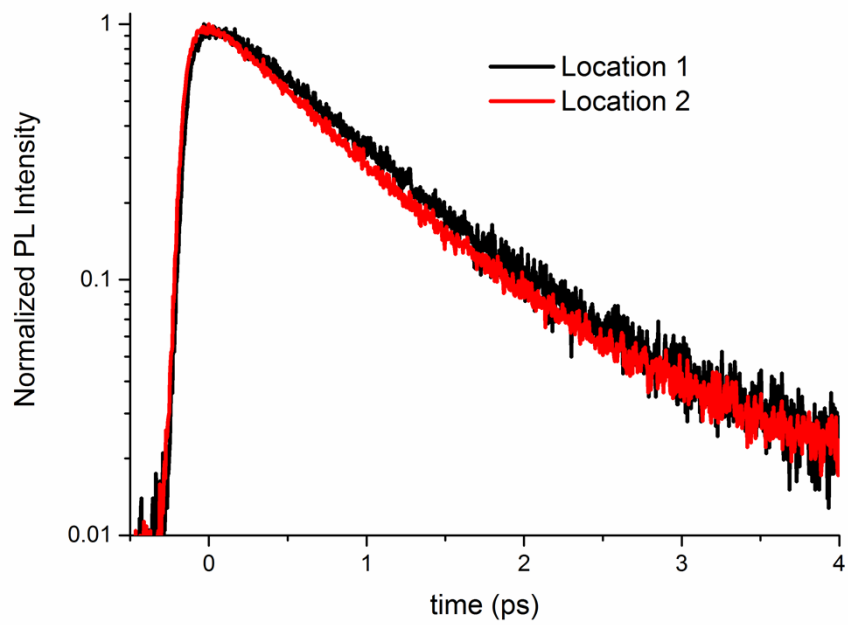

**Fig. S4.** *PL decay for  $WS_2$  monolayer at different locations at pump intensity of  $5 \text{ nJ/cm}^2$ .*

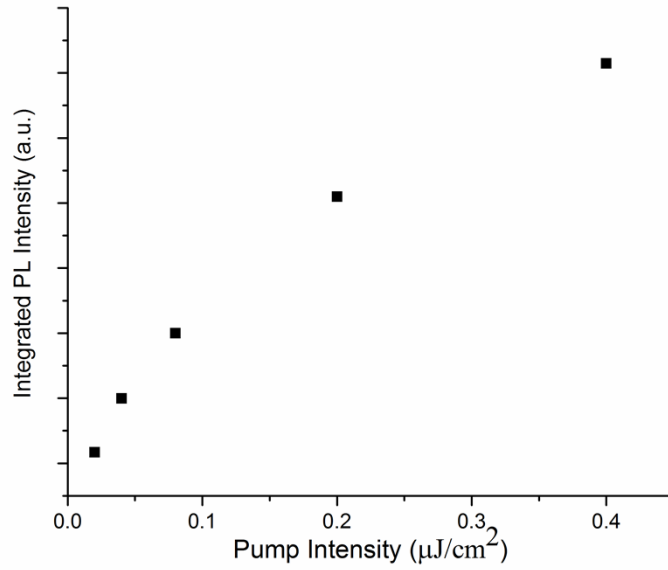

**Fig. S5.** Integrated PL intensity for monolayer  $\text{WS}_2$  as a function of pump intensity.

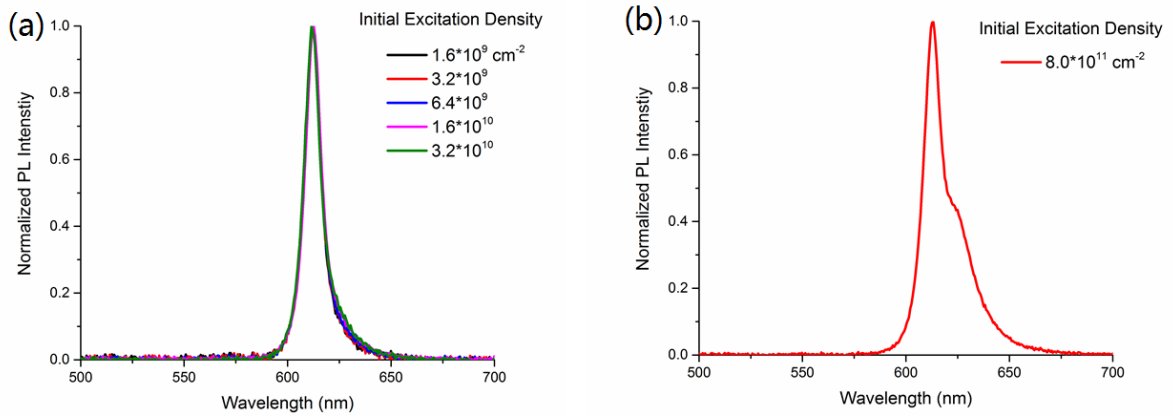

**Fig S6.** Evolution of PL spectra in  $\text{WS}_2$  monolayer with the pumping intensity. We observed an obvious biexciton emission peak only at pump intensity great than  $8.0 \cdot 10^{11} \text{ cm}^{-2}$  (b).

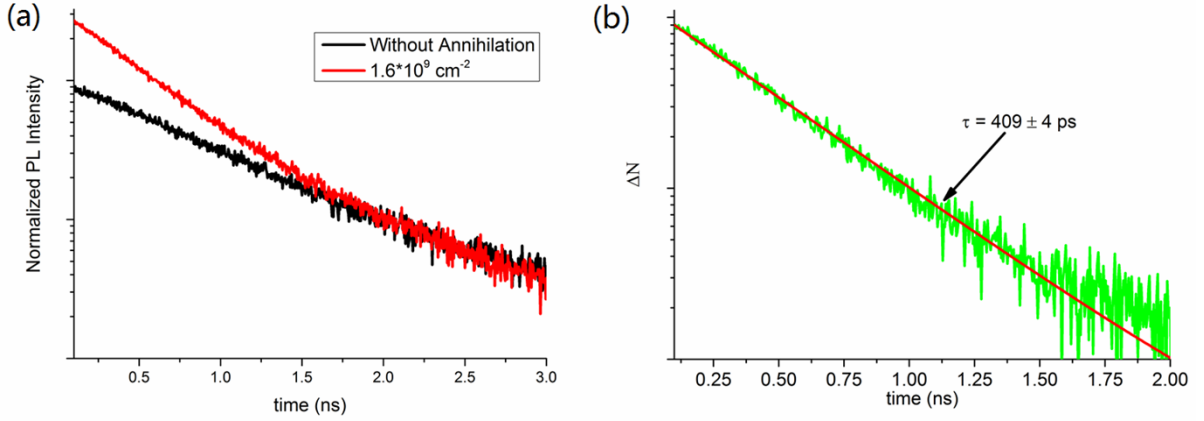

**Fig. S7.** (a) Normalize the decay curves at the low pump intensity (without annihilation) and high exciton density ( $1.6 \times 10^9 \text{ cm}^{-2}$ ) at the long delay time of 2 ns. (b) The subtracted decay curve at the low pump intensity from the high pump intensity and fit the subtracted curve with a single exponential decay. The obtained annihilation time is  $\sim 400$  ps.

## Quantum yield measurements

We measured the quantum yield of WS<sub>2</sub> monolayer, bilayer, and trilayer following the method referring in previous study<sup>1</sup>. We used a calibrated reference consisting of a thin film of rhodamine-6G dye molecules. The films were prepared by spin coating a glass substrate with a concentrated methanol solution of rhodamine-6G. We firstly calibrated the absolute QY of our reference film using the methanol solution of rhodamine-6G, which has a quantum yield of 100%. With this reference, we then determined the QY of WS<sub>2</sub> films.

## Reference

1. Mak, K. F. L., C.; Hone, J.; Shan, J.; Heinz, T. F., *Phys. Rev. Lett.* 2010, **105**, 136805.
